1 **Glutamine metabolism enables NKT cell homeostasis and function through the**  
2 **AMPK-mTORC1 signaling axis**

3  
4 Ajay Kumar<sup>a,1</sup>, Emily L. Yarosz<sup>b</sup>, Anthony Andren<sup>c</sup>, Li Zhang<sup>c</sup>, Costas A. Lyssiotis<sup>c,d,e</sup>, and  
5 Cheong-Hee Chang<sup>a,b,1,2</sup>

6  
7 a. Department of Microbiology and Immunology, University of Michigan Medical School, Ann  
8 Arbor, MI 48109, USA

9 b. Immunology Graduate Program, University of Michigan Medical School, Ann Arbor, MI  
10 48109, USA

11 c. Department of Molecular and Integrative Physiology, University of Michigan Medical School,  
12 Ann Arbor, MI 48109, USA

13 d. Department of Internal Medicine, Division of Gastroenterology and Hepatology, University  
14 of Michigan, Ann Arbor, MI 48109, USA

15 e. Rogel Cancer Center, University of Michigan, Ann Arbor, MI 48109, USA

16

17 <sup>1</sup> A.K. and C-H.C. are joint senior authors.

18 <sup>2</sup> C-H.C. is the lead contact.

19

20 **Running title:** Glutamine metabolism in NKT cells

21

22 **Keywords:** Metabolism, glutathione, ROS, glycosylation

23

24

25 \*Address correspondence and reprint requests to Drs. Ajay Kumar or Cheong-Hee Chang,  
26 Department of Microbiology and Immunology, University of Michigan Medical School, 5641  
27 Medical Science Building II, Ann Arbor, MI 48109-0620, USA. E-mail addresses:  
28 [ajkumar@umich.edu](mailto:ajkumar@umich.edu); [heechang@umich.edu](mailto:heechang@umich.edu).

29 **Abstract**

30 Cellular metabolism is essential in dictating conventional T cell development and  
31 function, but its role in natural killer T (NKT) cells has not been well studied. We have previously  
32 shown that NKT cells operate distinctly different metabolic programming from CD4 T cells,  
33 including a strict requirement for glutamine metabolism to regulate NKT cell homeostasis.  
34 However, the mechanisms by which NKT cells regulate glutamine metabolism for their  
35 homeostasis and effector functions remain unknown. In this study, we report that steady state  
36 NKT cells have higher glutamine levels than CD4 T cells and NKT cells increase glutaminolysis  
37 upon activation. Among its many metabolic fates, NKT cells use glutamine to fuel the  
38 tricarboxylic acid cycle and glutathione synthesis, and glutamine-derived nitrogen enables  
39 protein glycosylation via the hexosamine biosynthesis pathway (HBP). Each of these functions  
40 of glutamine metabolism was found to be critical for NKT cell survival and proliferation.  
41 Furthermore, we demonstrate that glutaminolysis and the HBP differentially regulate IL-4 and  
42 IFN $\gamma$  production. Finally, glutamine metabolism appears to be controlled by AMP-activated  
43 protein kinase (AMPK)-mTORC1 signaling. These findings highlight a unique metabolic  
44 requirement of NKT cells which can be potentially serve as an effective immunotherapeutic  
45 agent against certain nutrient restricted tumors.

46

47

48

49

50

51

52

53

54

55

56

57 **Significance**

58 NKT cells get activated very early during an immune response and produce cytokines and  
59 chemokines, which further activate other immune cell types. Although metabolism regulates  
60 these functions in other T cell subsets, little is understood about how metabolic pathways are  
61 controlled in NKT cells. The present study shows that NKT cells metabolize the amino acid  
62 glutamine through two different branches of metabolism, which control NKT cell homeostasis  
63 and expansion in a similar manner but control cytokine production differently. This glutamine  
64 dependency seems to be regulated by AMP-activated protein kinase (AMPK), which is a central  
65 regulator of energy homeostasis. Together, our study demonstrates a unique metabolic profile  
66 of glutamine metabolism in NKT cells which could be harnessed for NKT cell-based  
67 immunotherapy.

## 68 Introduction

69 Cellular metabolism plays a significant role in modulating T cell functions. Activated T  
70 cells undergo metabolic rewiring to fulfill the demands of clonal expansion as well as cytokine  
71 synthesis and secretion. A recent body of evidence has highlighted the role of cellular  
72 metabolism in regulating T cell plasticity. T cells shift glucose metabolism from a more glycolytic  
73 phenotype to a more oxidative phenotype after activation, a process known as metabolic  
74 reprogramming (1-3). This metabolic reprogramming is orchestrated by a series of signaling  
75 pathways and transcriptional networks (4-6). Additionally, the various T cell subsets operate  
76 distinct metabolic profiles that are critical for their specific effector functions (6, 7).

77 Invariant natural killer T (NKT) cells are innate-like lymphocytes that recognize glycolipid  
78 antigens in the context of the nonclassical MHC molecule CD1d, which is present on antigen  
79 presenting cells. NKT cells are selected by cortical thymocytes expressing CD1d and mature  
80 through a series of stages (8, 9). Thymic NKT cells are capable of producing the cytokines IFN $\gamma$ ,  
81 IL-4, and IL-17 and are thus termed NKT1, NKT2, and NKT17, respectively (10). NKT cells are  
82 a vital part of the defense against infectious diseases (11-13) and also play a role in the  
83 development of autoimmunity (14, 15) and asthma (16). Additionally, NKT cells mediate potent  
84 antitumor immune responses and have been utilized in immunotherapy for cancer patients  
85 using various immunomodulatory approaches (17-20).

86 NKT cells express promyelocytic leukemia zinc finger (PLZF, encoded by *Zbtb16*), a  
87 transcription factor required for NKT cell development and function (8, 21, 22). Several studies  
88 have shown that metabolic signals are critical for NKT cell development and function.  
89 Mammalian target of rapamycin (mTOR) complex 1 and complex 2 integrate various  
90 environmental cues to regulate cellular growth, proliferation, and metabolism (23, 24). Deletion  
91 of either mTORC1 or mTORC2 leads to a block in NKT cell development during which NKT  
92 cells accumulate in the early developmental stages (25, 26). Additionally, mTORC1 is a critical  
93 regulator of glycolysis and amino acid transport in T cells (27, 28). mTORC1 has been shown  
94 to be negatively regulated by AMP-activated protein kinase (AMPK) in T cells (29). AMPK  
95 senses cellular energy levels and in turn activates pathways necessary to maintain cellular  
96 energy balance. Additionally, loss of the AMPK-interacting adaptor protein folliculin-interacting  
97 protein 1 (Fnip1) results in defective NKT cell development (30).

98           As NKT cells develop and mature in the thymus, they become more quiescent and  
99   display lower metabolic activity in the peripheral organs compared to conventional T cells (31).  
100   We have shown that resting NKT cells have lower glucose uptake and mitochondrial function  
101   compared to conventional T cells, which is regulated by PLZF (32). Furthermore, high  
102   environmental levels of lactate are detrimental for NKT cell homeostasis and cytokine  
103   production, suggesting that reduced glycolysis is essential for NKT cell maintenance (32).  
104   Interestingly, NKT cells preferentially partition glucose into the pentose phosphate pathway  
105   (PPP) and contribute less carbon into the tricarboxylic acid (TCA) cycle than CD4 T cells.  
106   Recently, lipid synthesis has also emerged as a critical regulator of NKT cell responses (33).

107           In addition to glucose, rapidly proliferating cells require the amino acid glutamine to  
108   produce ATP, biosynthetic precursors, and reducing agents (6, 34). Glutaminolysis refers to the  
109   breakdown of the glutamine to fuel metabolism. In some proliferating cell types, glutaminolysis  
110   can take place in the mitochondria, where glutamine is converted to glutamate by the  
111   glutaminase (GLS) enzyme. From here, glutamate can undergo several metabolic fates. For  
112   one, glutamate can be deaminated into the TCA cycle intermediate  $\alpha$ -ketoglutarate ( $\alpha$ KG) by  
113   either glutamate dehydrogenase (GDH) or aminotransferases. Glutamate can also be  
114   transported back into the cytosol and produce glutathione (GSH), a critical mediator of cellular  
115   redox balance (35). Additionally, glutamine-derived nitrogen can be used to fuel *de novo*  
116   glycosylation precursor biogenesis in the hexosamine biosynthesis pathway (HBP) (36, 37).

117           A growing body of work has recently begun to highlight the importance of glutamine  
118   metabolism in modulating T cell-mediated immunity. Activated T cells not only upregulate amino  
119   acid transport but also increase the expression of enzymes involved in glutamine metabolism  
120   (6, 34). In addition, glutamine deprivation suppresses tumor growth and induces cell death in  
121   several cancer types (38, 39). The glutamine dependency displayed by cancerous cells has  
122   been referred to as glutamine addiction (40, 41). Similarly, we have previously shown that NKT  
123   cells rely on glutamine for their survival and proliferation (32). Despite this, the precise metabolic  
124   pathways and outputs of glutamine metabolism in NKT cells remain unknown.

125           In the current study, we report that NKT cells have higher glutamine metabolism than  
126   CD4 T cells, and NKT cells enhance glutamine metabolism after activation. NKT cells use  
127   glutamine-derived carbon to fuel the TCA cycle and glutamine-derived nitrogen to fuel the HBP

128 while simultaneously supporting GSH generation via glutamine-derived glutamate. More  
129 importantly, these processes are critical for NKT cell survival and proliferation. NKT cells require  
130 glutaminolysis for IL-4 production, but they use the HBP to support IFN $\gamma$  production.  
131 Furthermore, we demonstrate that NKT cells are glutamine addicted, as glucose is not sufficient  
132 to fuel mitochondrial function in the absence of glutamate oxidation. Lastly, AMPK-mTORC1  
133 signaling is involved in the regulation of glutamine metabolism in NKT cells.

134

## 135 **Results**

### 136 **NKT cells upregulate glutamine metabolism upon activation**

137 We previously reported that resting NKT cells are less glycolytic than CD4 T cells and  
138 rely on glutamine for their survival and proliferation (32). To gain a better understanding of  
139 glutamine metabolism in NKT cells, we assessed metabolite levels in freshly sorted NKT and  
140 CD4 T cells using liquid chromatography (LC)-coupled tandem mass spectrometry (LC-  
141 MS/MS)-based metabolomics. Metabolomic analysis showed that NKT cells have lower levels  
142 of metabolites related to glycolysis but higher levels of metabolites related to glutaminolysis  
143 compared to CD4 T cells (Fig. 1A). Pathway enrichment analysis revealed increased amino  
144 acid metabolism in NKT cells, which includes glutamine metabolism (Fig. S1A). In addition to  
145 glutamine, other metabolites such as glutamate, arginine, and asparagine were relatively high  
146 in NKT cells compared to CD4 T cells (Fig. 1B). To investigate whether NKT cells upregulate  
147 glutaminolysis upon activation, we measured intracellular metabolite levels after 3 days of  
148 stimulation using LC-MS/MS. Metabolites from the culture media were measured  
149 simultaneously. Metabolites downstream of glutamine metabolism were increased and  
150 decreased in cells and culture media, respectively, upon activation (Fig. 1C and 1D). These  
151 data suggest that NKT cells enhance both glutamine import and utilization during activation.  
152 Indeed, the expression of CD98, a heterodimeric amino acid transporter known to uptake  
153 glutamine (42), was increased on activated NKT cells (Fig. S1B). Moreover, the levels of  
154 metabolites derived from glutamine such as glutamate,  $\alpha$ KG, and GSH were increased after  
155 activation (Fig. 1C, and S1C- S1E). We also observed that the expression of genes encoding  
156 key enzymes involved in glutamine metabolism was elevated after activation (Fig. S1F).  
157 Overall, NKT cells upregulate glutamine metabolism upon activation.

158

### 159 **Glutaminolysis is essential for NKT cell survival and proliferation**

160 Glutamine is a major source of energy and carbon molecules in rapidly proliferating cells  
161 like immune cells and cancerous cells (41). NKT cells have been shown to rely on glutamine  
162 for their survival and proliferation (32), prompting us to investigate whether this dependency on  
163 glutamine is due to glutaminolysis. We used a variety of pharmacological inhibitors to examine  
164 the importance of each branch of glutamine catabolism for NKT cell responses (Fig. 2A). To

165 begin, we measured glutamate in NKT cells activated under glutamine deprivation conditions.  
166 We found that glutamate levels are decreased when cells are grown in the absence of glutamine  
167 (Fig. 2B). Next, to confirm whether the oxidation of glutamine into glutamate is necessary for  
168 NKT cell survival and proliferation, cells were activated in the presence or absence of the GLS  
169 inhibitor CB839. GLS inhibition impaired NKT cell survival, proliferation, and activation (Fig.  
170 2C).

171 Next, we used mice having a T cell-specific deletion of GLS1 (GLS1<sup>fl/fl</sup> CD4-Cre, referred  
172 to as GLS1 KO) (6) to validate the responses caused by the pharmacological inhibitor. GLS1  
173 deficiency did not affect NKT cell development in the thymus, but NKT cell numbers were  
174 slightly reduced in the spleens of these mice (Fig. S2A and S2B), suggesting a role of glutamine  
175 in peripheral NKT cell maintenance. Next, we measured cell survival and proliferation in  
176 activated WT and GLS1 KO NKT cells. Similar to what was seen with CB839, GLS1 deficient  
177 cells not only died more than WT cells but also proliferated worse than WT cells (Fig. 2D).

178 Because glutamine contributes to cellular redox regulation through glutathione (GSH)  
179 synthesis, we investigated whether glutamine is converted to GSH in the absence of glutamine.  
180 As expected, GSH levels were decreased in NKT cells grown under glutamine deprivation  
181 conditions (Fig. 2E). GSH is critical for NKT cell homeostasis, since cell survival and  
182 proliferation were impaired when GSH synthesis was inhibited by adding buthionine sulfoximine  
183 (BSO) to the culture media (Fig. 2F).

184 In addition to GSH,  $\alpha$ KG is produced from glutamate, after which it can then enter the  
185 TCA cycle. The elevated levels of  $\alpha$ KG in activated NKT cells prompted us to examine if the  
186 conversion of glutamate to  $\alpha$ KG is critical for NKT cells. Like GLS inhibition, GDH inhibition  
187 using the pan dehydrogenase inhibitor epigallocatechin-3-gallate (EGCG) reduced cell survival  
188 and proliferation (Fig. 2G). Furthermore, GDH inhibition decreased mitochondrial mass and  
189 mitochondrial membrane potential (Fig. S2C). To confirm whether glutamate contributes to  
190 mitochondrial energy production in NKT cells, ATP was measured. ATP levels decreased  
191 significantly after GLS inhibition, suggesting that glutamate fuels mitochondrial ATP production  
192 (Fig. S2D). Therefore, glutaminolysis is necessary not only for mitochondrial anaplerosis but  
193 also for GSH synthesis and ATP production. Collectively, glutaminolysis is critical for NKT cell  
194 survival and optimal proliferation, potentially by supporting mitochondrial function.



195  
196 **NKT cell homeostasis depends upon the contribution of glutamine-derived nitrogen to**  
197 **the hexosamine biosynthesis pathway**

198       Glucose and glutamine contribute carbon and nitrogen, respectively, via the HBP in T  
199 cells to generate UDP-GlcNAc, the primary donor for cellular glycosylation (Fig. 2A) (37). The  
200 HBP deposits O-linked and N-linked glycosylation marks on proteins, which are necessary for  
201 protein stability and function. To test the role of *de novo* glycosylation biosynthesis via the HBP  
202 in NKT cells, we examined total protein glycosylation upon glutamine deprivation by measuring  
203 O-GlcNAc-ylation of the proteome. Activated NKT cells showed increased total protein  
204 glycosylation (Fig. 2H) as well as higher mRNA expressions of both the *Gfat1* and *Ogt* genes  
205 (Fig. S2E). Both glucose and glutamine are required for HBP initiation. Next, to understand how  
206 nutrient limitation impacts the HBP, O-GlcNAc levels were measured in cells stimulated in the  
207 presence of glucose only, glutamine only, or both. We found that glutamine limitation reduced  
208 *de novo* O-GlcNAc synthesis significantly more than glucose limitation does in activated NKT  
209 cells (Fig. 2I) suggesting increased salvage pathway for HBP synthesis under glucose  
210 restriction.

211       To determine the role of the HBP in NKT cell responses, we treated NKT cells with 6-  
212 diazo-5-oxo-L-nor-leucine (DON), a pan glutamine-deamidase inhibitor (43), during activation.  
213 We observed that DON treatment reduced O-GlcNAc levels (Fig. S2F) leading to impaired NKT  
214 cell survival accompanied by reduced cell proliferation (Fig. 2J). Similarly, inhibition of OGT by  
215 OSMI resulted in more cell death and less cell proliferation than untreated cells (Fig. 2K). These  
216 data suggest that the HBP is essential for NKT cell homeostasis.

217  
218 **NKT cell homeostasis requires GSH-mediated redox balance**

219       NKT cells rely on glutamine for GSH, which is vital for the effective management of  
220 reactive oxygen species (ROS) (44). Therefore, NKT cells may be susceptible to cell death in  
221 the absence of GSH. We have previously shown that NKT cells are highly susceptible to  
222 oxidative stress (45). Since GSH maintains intracellular redox balance, we examined total ROS  
223 production in NKT cells treated with the GSH inhibitor BSO. Total ROS levels, as measured by

224 DCFDA, were greater in the presence of the inhibitor than the control (Fig. 3A). In contrast,  
225 GSH inhibition reduced mitochondrial ROS, mitochondrial mass, and mitochondrial potential  
226 (Fig. 3B-3D), suggesting that GSH is critical for mitochondrial functions.

227 These observations suggest that the high levels of cell death in NKT cells after inhibition  
228 of GSH synthesis could be due to increased ROS. To test this, we treated cells with the ROS  
229 scavenger N-acetyl-cysteine (NAC) to reduce ROS in GSH inhibited cells. We found that NAC  
230 restored ROS levels in GSH inhibited cells back to the control levels (Fig. 3E). Interestingly,  
231 NKT cell survival was rescued by NAC treatment, whereas cell proliferation (Fig. 3F). The poor  
232 proliferation was correlated with the incomplete restoration of mitochondrial membrane potential  
233 by NAC (Fig. 3G). Together, these data suggest that NKT cell survival is supported by GSH-  
234 mediated redox balance whereas cell proliferation might be supported by GSH-mediated control  
235 of mitochondrial function.

236

### 237 **Distinct glutamine oxidation pathways regulate NKT cell effector functions**

238 We have previously shown that glucose availability is critical for NKT cell cytokine  
239 production (32). To investigate whether glutaminolysis has any role in cytokine production, we  
240 activated NKT cells with and without the GLS inhibitor. Additionally, we activated WT and GLS1  
241 KO NKT cells. GLS activity is critical for IL-4 production in NKT cells, as IL-4<sup>+</sup> cells were  
242 significantly reduced upon CB839 treatment (Fig. S3A). Similarly, both intracellular and  
243 secreted levels of IL-4 were lower in GLS1 KO cells than WT NKT cells (Fig. 4A and S3B).

244 We next asked whether the HBP regulates cytokine production in NKT cells. In contrast  
245 to GLS inhibition, inhibition of GFAT1 via DON treatment decreased IFN $\gamma$  but not IL-4 production  
246 (Fig. 4B and 4C). However, inhibition of OGT significantly reduced IFN $\gamma$  expression but only  
247 moderately affected IL-4 expression (Fig. S3C). Overall, our data suggest that *de novo* HBP  
248 activity is critical for cytokine production by NKT cells.

249 ROS seems to be important for NKT cell effector functions at a steady state. However,  
250 ROS is decreased upon NKT cell activation (45). To examine whether GSH-mediated redox  
251 balance modulates NKT cell effector function, we activated NKT cells in the presence or  
252 absence of BSO and measured cytokine expression. Interestingly, cytokine production was not

253 affected by GSH inhibition (Fig. 4D and S3D), even though GSH inhibited cells have higher total  
254 ROS levels (Fig. 3A). Similar to GLS inhibition, GDH inhibition led to a dramatic reduction in IL-  
255 4<sup>+</sup> NKT cells but only a slight reduction in IFN $\gamma$ <sup>+</sup> NKT cells (Fig. S3E).

256 Since glutamine fuels both glutaminolysis and the HBP (Fig. 2A), we were interested in  
257 investigating the role of glutamine itself in cytokine expression. We stimulated NKT cells in the  
258 presence or absence of glutamine and compared the cytokine expression. Glutamine  
259 deprivation reduced the expression of IFN $\gamma$ , IL-4, and IL-17 by NKT cells (Fig. 4E) suggesting  
260 a distinct role of glutamine metabolic pathways for cytokine expression in NKT cells.

261

## 262 **Mitochondrial anaplerosis fueled by glutamine-derived $\alpha$ KG is necessary for NKT cell** 263 **homeostasis and effector function**

264 Glucose can be metabolized through glycolysis to fuel the TCA and produce lactate.  
265 Previously, we showed that the expression of PPP genes was significantly higher in NKT cells  
266 compared to CD4 T cells (32). Consequently, the levels of glycolytic metabolites were lower in  
267 NKT cells than CD4 T cells (Fig. 1A). Additionally, glucose deprivation did not affect NKT cell  
268 survival or proliferation, raising the possibility that NKT cells rely primarily on glutamine (32).  
269 To determine if NKT cells are addicted to glutamine, we first measured the expression of  
270 hexokinase 2 (HK2), which converts glucose into glucose 6-phosphate during the first step of  
271 glycolysis. Consistent with our previous finding that CD4 T cells take up more glucose than NKT  
272 cells upon activation (32), HK2 expression was also higher in activated CD4 T cells (Fig. 5A).  
273 Next, we measured PPP metabolites in NKT and CD4 T cells by LC-MS/MS. Compared to CD4  
274 T cells, NKT cells have notably higher levels of PPP metabolites before activation (Fig. 5B).  
275 Additionally, PPP metabolite levels were further increased upon activation (Fig. 5C), suggesting  
276 NKT cells are primarily metabolizing glucose via the PPP. Because glutamate-derived  $\alpha$ KG  
277 plays a key role in mitochondrial anaplerosis for NKT cell survival and proliferation, we  
278 investigated whether glucose could fuel mitochondrial activity in the absence of glutamine. To  
279 do this, we measured glucose uptake in NKT cells grown under glutamine deprivation  
280 conditions. The results showed that NKT cells were not able to efficiently take up glucose under  
281 glutamine deprivation conditions (Fig. S4A) and that they preferentially used glutamine to  
282 produce ATP (Fig. S4B).

283 Elevated PPP gene expression suggests that glucose is metabolized mainly via the PPP  
284 in NKT cells (32) and glucose-derived pyruvate would not be sufficient to supplement  
285 mitochondrial anaplerosis in NKT cells. We tested this hypothesis by adding sodium pyruvate  
286 during GDH inhibition to see whether the reduced cell survival and proliferation observed after  
287 GDH inhibition can be rescued by pyruvate directly. Strikingly, we observed that NKT cell  
288 survival and proliferation were restored to control levels after feeding sodium pyruvate to GDH  
289 inhibited cells (Fig. 5D).

290 To further support that glutamate-derived  $\alpha$ KG is essential for mitochondrial anaplerosis  
291 in NKT cells, we provided dimethyl  $\alpha$ -ketoglutarate (DM $\alpha$ KG), a cell-permeable  $\alpha$ KG analog, to  
292 the culture media in the presence of EGCG. Both cell survival and proliferation were restored  
293 to normal levels by  $\alpha$ KG supplementation in GDH inhibited NKT cells (Fig. 5E). Additionally,  
294 DM $\alpha$ KG partially rescued cell survival under glutamine deprivation conditions (Fig. S4C) as well  
295 as cell proliferation in CB839 treated NKT cells (Fig. S4D), suggesting that glutamine-derived  
296  $\alpha$ KG is essential to maintain NKT cell survival and proliferation. As expected, DM $\alpha$ KG  
297 supplementation not only rescued mitochondrial function and NKT cell activation (Fig. 5F) but  
298 also restored cytokine production under either glutamine-deficient culture conditions (Fig. 5G  
299 and S4E) or GLS inhibition (Fig. S4F). Similarly, DM $\alpha$ KG corrected the cytokine profiles of GDH  
300 inhibited cells (Fig. S4G).

301 These data demonstrate that NKT cells exhibit lower levels of glycolysis, which is  
302 insufficient to provide enough glucose-derived metabolites to the TCA cycle. As a result, NKT  
303 cells primarily rely on glutamine to fuel mitochondrial function for their survival, proliferation, and  
304 cytokine production.

305

### 306 **Glutaminase is crucial for proper NKT cell responses to *Listeria monocytogenes*** 307 **infection**

308 To investigate the role of glutamine metabolism in NKT cell-mediated immune responses  
309 *in vivo*, we used the *Listeria* infection model. We injected *Listeria monocytogenes* expressing  
310 ovalbumin intraperitoneally to WT and GLS1 KO mice. Bacterial load and NKT cell-specific  
311 functions were analyzed after 2 days of infection. This time point allows us to study NKT cell-

312 mediated effects on bacterial infection, as CD4 and CD8 T cells are not able to mount an  
313 immune response in this short time frame. To examine whether NKT cell metabolic responses  
314 are changed after *Listeria* infection, we compared GSH and CD98 expression in WT mice. Both  
315 CD98 expression (Fig. 6A) and GSH levels (Fig. 6B) were greatly increased in splenic and  
316 hepatic NKT cells in infected mice compared to PBS-injected controls. When bacterial loads  
317 were compared, GLS1 KO mice had higher bacterial loads than WT mice in both the spleen  
318 and liver (Fig. 6C). Higher bacterial burden correlated with impaired activation of NKT cells from  
319 GLS1 KO mice (Fig. 6D). We then asked whether the high bacterial load in GLS1 KO mice is  
320 due to slower NKT cell expansion or diminished cytokine expression. We observed that cell  
321 proliferation was impaired in NKT cells from GLS1 KO mice in response to bacterial challenge  
322 (Fig. 6E), supporting the important role for glutamine metabolism in NKT cell responses.  
323 However, like our *in vitro* observations, *Listeria* infection did not significantly affect IFN $\gamma$   
324 production in NKT cells (Fig. 6F). Overall, GLS-mediated glutaminolysis is essential for NKT  
325 cells to mediate protective immune responses against *Listeria* infection.

326

### 327 **The AMPK- mTORC1 axis regulates NKT cell glutamine metabolism**

328 Studies have linked mTORC1 activation to glutamine addiction in some types of cancer  
329 cells (46). Moreover, mTOR signaling is critical for the development and function of NKT cells  
330 (25, 47). We have previously shown that mTORC1 activity is enhanced upon NKT cell activation  
331 (32). Furthermore, NKT cells stimulated in the presence of high lactate showed reduced  
332 mTORC1 activity accompanied by poor proliferation (32). As such, we reasoned that mTORC1  
333 signaling might affect glutamine metabolism in NKT cells. To test this, we used the  
334 pharmacological reagent rapamycin to inhibit mTORC1 activity because mTORC1 deficiency  
335 compromise NKT cell development (Prevot et al., 2015). We stimulated NKT cells in the  
336 presence of rapamycin and examined glycolysis and amino acid transport by comparing the  
337 expression of HK2 and CD98, respectively. We also measured glutamine, glutamate, and GSH  
338 to study glutaminolysis. mTORC1 inhibition by rapamycin resulted in reduced HK2 expression,  
339 CD98 expression, and GSH levels (Fig. 7A- 7C). Interestingly, mTORC1 inhibition also reduced  
340 proteome O-GlcNAc levels (Fig. 7D), suggesting that mTORC1 is a key regulator of glucose  
341 and glutamine metabolism including glycosylation in NKT cells.

342 mTORC1 signaling integrates growth factors and nutrient signals to regulate cell growth.  
343 mTORC1 is unresponsive to these signals under amino acid deprivation (48). In particular,  
344 glutamine and glutamate are essential for maintaining mTORC1 activity in T cells (7, 49).  
345 Therefore, we asked whether glutamine or glutamate availability is necessary for mTORC1  
346 activity in NKT cells. Indeed, both glutamine deprivation and GLS inhibition reduced the  
347 phosphorylation of ribosomal protein S6 (pS6), a substrate of mTORC1 (Fig. 7E). Similarly,  
348 inhibition of GSH production and OGT activity also decreased mTORC1 activity (Fig. 7E).  
349 mTORC1 is known to enhance c-Myc expression (50). We found that c-Myc levels were  
350 reduced in NKT cells grown under glutamine deprivation conditions as well as after CB839  
351 treatment (Fig. 7F), indicating that GLS activity regulates mTORC1 signaling in NKT cells.  
352 Together, these data suggest that crosstalk between glutamine metabolism and mTORC1  
353 signaling regulates cell proliferation in NKT cells.

354 The levels of phosphorylated AMPK (pAMPK) increase during primary T cell responses  
355 *in vivo* (51), and pAMPK is known to negatively regulate mTORC1 activity in T cells (29). Having  
356 observed that mTORC1 promotes glutamine metabolism in NKT cells, we investigated the role  
357 of the AMPK. We found that pAMPK levels were greatly increased in stimulated NKT cells  
358 compared to unstimulated cells (Fig. 7G). Next, we used T cell-specific AMPK KO mice to test  
359 our hypothesis that AMPK deficiency would elevate glutaminolysis, which would have a  
360 beneficial effect on NKT cells. AMPK KO mice have no observed defects in conventional T cell  
361 (52) or NKT cell development or peripheral maintenance (Fig. S5). We first analyzed activated  
362 NKT cell survival and proliferation in WT and AMPK KO mice. AMPK KO NKT cells were more  
363 resistant to cell death and proliferated better than WT cells (Fig. 7H). As expected, AMPK KO  
364 NKT cells have higher levels of glutamate and  $\alpha$ KG (Fig. 7I) and expressed more IL-4 and IL-  
365 17 (Fig. 7J), suggesting that glutaminolysis is enhanced in AMPK KO NKT cells. Furthermore,  
366 in contrast to WT, AMPK KO NKT cells proliferated efficiently even in the presence of GLS  
367 inhibitor (Fig. 7K). Together, this data suggests that the AMPK-mTORC1 signaling axis controls  
368 glutamine metabolism in NKT cells.

369

370

## 371 Discussion

372 Glucose and glutamine are the two primary nutrients utilized by highly proliferative cells,  
373 including T cells (53). Unlike glucose, glutamine can provide both carbon and nitrogen for  
374 anabolic reactions (54). Indeed, glutamine-derived nitrogen is critical for the synthesis of  
375 nitrogenous compounds such as nucleic acids, glycosoamino glycans, and non-essential amino  
376 acids (55). Here, we demonstrate that glutamine is metabolized via glutaminolysis and the HBP  
377 in activated NKT cells to support their survival, proliferation, and effector functions. We also  
378 show that NKT cells are glutamine addicted because their low glycolytic rate cannot spare  
379 enough glucose-to support the TCA cycle. Moreover, glutamine metabolism seems to be  
380 regulated by AMPK-mTORC1 signaling in NKT cells.

381 Although we comprehensively investigated glutamine metabolism in NKT cells using  
382 pathway specific inhibitors, we used T cell specific GLS1 KO mice to confirm GLS inhibition  
383 studies. Since these studies were performed on primary NKT cells which are in low abundant  
384 than other conventional T cell, the experiments with genetically knocked down of genes using  
385 specific siRNAs is quite difficult. In line with this, glutamine tracing experiments were not  
386 feasible with primary NKT cells.

387 Glutamine metabolism is differentially regulated in the various T cell subsets (6, 7). In  
388 addition to synthesizing glutamine *de novo*, proliferating cells can acquire glutamine from the  
389 extracellular environment to meet their energetic requirements. Resting NKT cells have higher  
390 glutamine levels than CD4 T cells, which may explain why they rely on glutamine upon  
391 activation for their survival and proliferation. This idea is supported by the fact that GLS1 KO  
392 mice exhibit lower NKT cell frequencies in the spleen compared to WT. In addition to glutamine,  
393 the levels of other amino acids were also higher in activated NKT cells compared to CD4 T  
394 cells. Whether NKT cells have enhanced uptake or increased synthesis of these amino acids  
395 from glutamine warrants further investigation. The high rate of glutamine consumption in NKT  
396 cells suggests that these cells use glutamine for multiple roles beyond protein synthesis. We  
397 found that NKT cells use glutamine in the HBP to modulate protein modification processes like  
398 glycosylation. It is important to note that TCA cycle intermediates can regulate epigenetic  
399 signatures in activated T cells (6, 7). These metabolites are critical in regulating T helper cell  
400 subsets and their cytokine production (56). In corroboration with these facts, inhibiting

401 glutamate oxidation reduced cytokine production by NKT cells, which was rescued by  $\alpha$ KG  
402 supplementation. Interestingly, NKT cells were observed to rely on glutaminolysis primarily for  
403 IL-4 production but depend upon glutamine oxidation from the HBP for IFN $\gamma$  production. We  
404 also showed that NKT cells depend upon GLS to proliferate *in vivo* following *Listeria* infection.  
405 However, GLS does not control IFN $\gamma$  production, indicating that GLS largely controls NKT cell  
406 homeostasis. Extending these findings to their *in vivo* relevance, we observed slower NKT cell  
407 proliferation and higher bacterial burden after *Listeria* infection in GLS1 KO mice.

408 Mitochondrial homeostasis is critical for NKT cell development (25, 47). T cell-specific  
409 deletion of RISP (T-Uqcr<sup>-/-</sup>), a nuclear-encoded protein subunit of mitochondrial complex III,  
410 has recently been shown to block NKT cell development (57). Additionally, conventional T cells  
411 use glucose to produce lactate and fuel mitochondrial metabolism. These processes are critical  
412 for T cell homeostasis and effector function (58). NKT cells have low glucose uptake but high  
413 PPP enzyme expression and metabolite abundance. Together, these results suggest that less  
414 glucose-derived carbon is oxidized through glycolysis and therefore less is available to support  
415 TCA cycling in NKT cells. Based on the reduced availability of glucose-intermediates to fuel  
416 respiration, NKT cells instead depend upon glutamine to fuel the TCA cycle via the production  
417 of  $\alpha$ KG.

418 ROS can act as signaling messengers as well as positively modify protein structure;  
419 however, high concentrations of ROS can lead to cell death (35, 59). Antioxidation via GSH  
420 supports activation-induced metabolic reprogramming in T cells (35). Additionally, NKT cells  
421 reduce intracellular ROS levels upon activation (45), suggesting that high levels of ROS may  
422 be detrimental for activated NKT cells. Our data suggest that glutamine also contributes to GSH  
423 synthesis in NKT cells, which is critical for maintaining the redox balance necessary for cell  
424 survival. GSH also supports mitochondrial function in NKT cells, and this phenomenon might  
425 be due to mTORC1 activation. Further investigation is warranted to shed light on this  
426 mechanism.

427 Lymphocytes must balance a wide range of metabolic pathways to maintain homeostasis  
428 after activation. T cells use glutamine-dependent OXPHOS to produce ATP and remain viable  
429 in low glucose environments. Because NKT cells have low glycolytic capacity, AMPK is  
430 triggered upon activation to regulate glutamine metabolism. AMPK has been reported to



431 regulate mTORC1 in T cells (29). mTORC1 supports glycolysis by directly regulating pathway-  
432 specific gene expression in T cells (60). Previously, we have shown that mTORC1 inhibition by  
433 rapamycin not only compromised NKT cell survival and proliferation but also reduced glucose  
434 uptake (32). Here, we showed that rapamycin treatment negatively affected various steps of  
435 glutamine metabolism including glutamine transporter expression, HBP pathway activity, and  
436 GSH synthesis.

437 We report in this manuscript that glutamine fuel the HBP to maintain NKT cell  
438 homeostasis and effector function, shedding light on a potential mechanism for NKT survival in  
439 the tumor microenvironment (TME). Low availability of glucose in the TME (27, 43) reduces  
440 conventional T cell proliferation and cytokine production (61, 62). However, glucose restriction  
441 likely does not affect NKT cell homeostasis, as these cells are more dependent upon glutamine.  
442 Our findings lead us to propose that NKT cells can be used as an effective immunotherapeutic  
443 agent against glucose-reliant tumors.

444 In conclusion, glutamine oxidation is pivotal for NKT cell survival and proliferation.  
445 Because NKT cells display inefficient glycolysis, we predict that they cannot effectively use  
446 glucose to fuel mitochondrial metabolism. Glutamine-derived GSH is critical in maintaining  
447 redox balance in NKT cells, which is essential for their survival. This study also reveals that  
448 NKT cells use different glutamine oxidation pathways for IL-4 and IFN $\gamma$  production. Moreover,  
449 AMPK-mTORC1 signaling regulates glutamine metabolism in NKT cells. Taken together, NKT  
450 cells have unique metabolic requirements, and a better understanding of these requirements  
451 may contribute to the development of new therapeutic targets to improve T cell-based therapies  
452 in the future.

453

## 454 **Materials and Methods**

### 455 **Mice**

456 Male and female C57BL/6 mice ranging from 8-12 weeks of age were either bred in-  
457 house or purchased from The Jackson Laboratory. T cell-specific GLS1 deficient mice (referred  
458 to as GLS1 KO) and AMPK deficient mice (referred to as AMPK KO) were generated by  
459 crossing GLS1<sup>f/f</sup> mice and AMPK<sup>f/f</sup> with CD4-Cre expressing mice purchased from The  
460 Jackson Laboratory. In all experiments, WT littermates were used as controls. All mice were  
461 bred and maintained under specific pathogen free conditions. All animal experiments were  
462 performed in accordance with the Institutional Animal Care and Use Committee of the University  
463 of Michigan.

### 464 **Cell isolation and activation**

465 Primary cell suspensions were prepared from spleens as per standard protocol (45). To  
466 sort NKT and CD4 T cells, B cells were excluded from whole splenocytes by incubating with  
467 anti-CD19 beads (Miltenyi Biotec) or by using the EasySep<sup>TM</sup> mouse CD19 positive selection  
468 kit (STEMCELL Technologies) as per the manufacturer's protocol. NKT and CD4 T cells were  
469 sorted on the basis of TCR- $\beta$  and PBS-57 loaded CD1d tetramer expression using a FACS Aria  
470 II (BD Biosciences). To study activated NKT cells, cells were stimulated with  $\alpha$ -  
471 Galactosylceramide ( $\alpha$ GalCer; 100 ng/ml) in RPMI 1640 medium supplemented with 10% FBS,  
472 2 mM glutamine, and penicillin/streptomycin at 37°C. For glucose and glutamine deprivation  
473 assays, sorted NKT cells were stimulated in glucose- and glutamine-free RPMI 1640 media  
474 supplemented with 10% dialyzed FBS (Sigma Aldrich). To inhibit GLS1 activity, CB839 (Sigma  
475 Aldrich) was used at 1.5 nM, 3 nM, 250 nM, or 500 nM. To inhibit GDH activity, epigallocatechin-  
476 3-gallate (EGCG) (Sigma Aldrich) was used at 10  $\mu$ M or 20  $\mu$ M. To inhibit GSH synthesis, L-  
477 buthionine-sulfoximine (BSO) (Sigma Aldrich) was used at 250  $\mu$ M or 500  $\mu$ M. Rapamycin  
478 (Sigma Aldrich) was used to inhibit mTORC1 activity at a concentration of 2nM. 6-diazo-5-oxo-  
479 L-norleucine (DON) was used to inhibit O-GlcNAc production at a concentration of 3  $\mu$ M, 6  $\mu$ M,  
480 or 20  $\mu$ M. To inhibit OGT1 activity, OSMI-1 (Sigma Aldrich) was used at 10  $\mu$ M or 20  $\mu$ M  
481 concentrations. For  $\alpha$ KG supplementation assays, dimethyl-2-oxoglutarate (DM $\alpha$ KG) (Sigma

482 Aldrich) was used at a 1mM concentration. N-acetyl cysteine (NAC) (Sigma Aldrich) was used  
483 at a 1mM concentration as an antioxidant.

#### 484 **Flow cytometry**

485 The following fluorescently conjugated antibodies were used in the presence of anti-  
486 FcγR mAb (2.4G2) for surface and intracellular staining (all from eBioscience): anti-mouse  
487 TCRβ (H57-597) Pacific Blue/APC, PBS-57 loaded CD1d tetramer APC/PE/Pacific Blue, anti-  
488 mouse CD4 APC-Cy7, anti-mouse IFN $\gamma$  PE/FITC, anti-mouse IL-4 PE-Cy7, and anti-mouse IL-  
489 17 PerCP-Cy5.5. Ki-67 PerCP-Cy5.5 staining was used to measure *in vivo* cell proliferation  
490 after *Listeria* infection. Dead cells were excluded by staining with LIVE/DEAD™ Fixable  
491 Yellow Dead Cell Stain Kit (405 nm excitation) (Invitrogen).

492 For intracellular cytokine expression, activated cells were re-stimulated with of PMA (50  
493 ng/mL, Sigma Aldrich) and of Ionomycin (1.5  $\mu$ M, Sigma Aldrich) in the presence of Monensin  
494 (3  $\mu$ M, Sigma Aldrich) for 4 h. Cells were then stained for surface antigens and intracellular  
495 cytokines according to manufacturer's instructions (BD Biosciences). For intracellular staining  
496 of phosphorylated ribosomal protein S6 (pS6<sup>Ser235/236</sup>) (Cell Signaling), HK2 staining  
497 (EPR20839) (Abcam), and O-GlcNAc (BD Biosciences), cells were permeabilized using 90%  
498 methanol. Cells were then incubated with pS6 or HK2 antibody for 1 h and O-GlcNAc antibody  
499 for 20 min at RT in the dark in cytoplasmic permeabilization buffer (BD Biosciences). Nuclear  
500 permeabilization buffer was used for c-Myc staining. For cell proliferation, NKT cells were  
501 labeled with 5  $\mu$ M CellTrace™ Violet (CTV) (Invitrogen) in 1X PBS containing 0.1% BSA for 30  
502 min at 37°C. Cells were stimulated as indicated and analyzed by flow cytometry on day three  
503 post-stimulation for CTV dilutions. Cells were acquired on a FACS Canto II (BD Biosciences).  
504 The data was analyzed using FlowJo (TreeStar software ver. 10.7.1).

#### 505 **Analysis of metabolic parameters**

506 To measure metabolic parameters, activated NKT cells ( $1 \times 10^5$ ) were incubated with different  
507 reagents as indicated in the fig. legends. To measure mitochondrial parameters, cells were  
508 incubated with 60 nM of the potentiometric dye tetramethylrhodamine methyl ester perchlorate  
509 (TMRM) (Invitrogen), 30 nM MitoTracker™ Green (Invitrogen), and 2.5  $\mu$ M MitoSOX (Invitrogen)  
510 for 30 min at 37°C in RPMI 1640 complete media. To measure total cellular ROS,  $1 \times 10^5$   
511 activated NKT cells were incubated with 1 mM 2',7'-dichlorodihydrofluorescein diacetate

512 (H<sub>2</sub>DCFDA) (Invitrogen) in RPMI complete media for 30 minutes at 37°C. To measure glucose  
513 uptake, cells were incubated in 2-(N-(7-nitrobenz-2-oxa-1,3-dioxol-4-yl) amino)-2-  
514 deoxyglucose (2-NBDG) (Invitrogen) (20 μM) for 1 h or as indicated at 37°C in glucose-free  
515 RPMI 1640 media containing 10% dialyzed FBS. To measure GSH, cells were stained using  
516 an intracellular glutathione detection assay kit (Abcam) for 20 min at 37°C in RPMI 1640  
517 complete media. Cells were stained for surface antigens and acquired on a FACS Canto II (BD  
518 Biosciences).

### 519 **ATP, glutamine/glutamate, αKG, and lactate assays**

520 CellTiter-Glo® Luminescent Cell Viability reagent (Promega) was used for ATP measurement.  
521 Intracellular lactate levels were measured using a plate-based fluorometric measurement kit  
522 (Cayman Chemicals), while glutamate levels were measured using Glutamine/Glutamate-Glo™  
523 Assay kit (Promega). αKG was measured using a colorimetric assay kit (Sigma Aldrich). All kits  
524 were used according to manufacturer's instructions.

### 525 **Metabolite measurements**

526 Cell lysate was prepared from resting NKT and CD4 T cells as well as stimulated NKT cells (5  
527 x 10<sup>5</sup> cells per replicate) by incubating the cells with 80% methanol and following a series of  
528 vigorous mixing steps. Media was mixed with 100% methanol and vigorously vortexed. Cells  
529 and media were spun down at maximum speed for 10 min at 4°C to remove membranous  
530 debris, and the lysate was collected for drying using a SpeedVac. Following drying, the lysate  
531 was reconstituted using 50/50 methanol/water for mass spectrometry-based metabolomics  
532 analysis using an Agilent 1290 Infinity II UHPLC combined with an Agilent 6470 QQQ LC/MS.

### 533 **RT Gene PCR assay**

534 Total RNA was isolated from unstimulated and stimulated NKT cells using a RNeasy Plus mini  
535 kit (Qiagen) according to manufacturer's instructions. PCR Array was performed according to  
536 the manufacturer's instructions (Qiagen) using Applied Biosystem's 7900HT Sequence  
537 Detection System. Fold changes were calculated from ΔCt values (gene of interest Ct value -  
538 an average of all housekeeping gene Ct values) using the ΔΔCt method. Gene expression of  
539 target genes was normalized to β-actin.

### 540 ***Listeria monocytogenes* infection**

541 *Listeria monocytogenes* expressing ovalbumin (LM-Ova strain 10403s) was grown in BHI broth  
542 media. Bacteria in a mid-log phase were collected for infection. GLS1 KO and WT littermate  
543 mice were injected intraperitoneally with either 200  $\mu$ L of sterile 1X PBS alone or 200  $\mu$ L of 1X  
544 PBS containing  $10^5$  CFU/mouse of LM-Ova. On day two post-infection, the bacterial burden  
545 was enumerated from homogenized spleen and liver samples by culturing serially diluted  
546 samples on LB agar plates and performing CFU determination. Intracellular cytokine expression  
547 by NKT cells was measured as described above.

#### 548 **Statistical analysis**

549 All graphs and statistical analyses were prepared using Prism software (Prism version 8;  
550 Graphpad Software, San Diego, CA). For comparison among multiple groups, data were  
551 analyzed using one-way ANOVA with the multi-comparison post-hoc test. Unpaired and paired  
552 Student's t-tests were used for comparison between two groups.  $P < 0.05$  was considered  
553 statistically significant.

554

555 **Acknowledgements**

556 We would like to thank Ms. Chauna Black for maintaining our mouse colony and performing  
557 genetic screening of all mice. We thank Dr. Mary O’Riordan (University of Michigan) for  
558 providing the 10403s LM-Ova strain of *Listeria monocytogenes*. Lastly, we acknowledge the  
559 National Institutes of Health Tetramer Facility for providing the CD1d tetramers necessary to  
560 study NKT cells.

561 This work was supported in part by National Institutes of Health Grants R01 AI121156 and R01  
562 AI148289 (to C-H.C.).

563 C.A.L. was supported by the NCI (R37 CA237421, R01 CA248160). Metabolomics studies  
564 performed at the University of Michigan were supported by NIH grant DK 097153, the Charles  
565 Woodson Research Fund, and the UM Pediatric Brain Tumor Initiative.

566

567 **Author Contributions**

568 A.K. planned and conceived the project, performed experiments, interpreted the data, and wrote  
569 the manuscript. C-H.C. secured funding, supervised the project, interpreted the data, and  
570 assisted in writing the manuscript. E.L.Y. performed experiments and helped in writing the  
571 manuscript. A.A. and L.Z. performed experiments. C.A.L. provided reagents and feedback as  
572 well as analyzed the data. All the authors have proofread the manuscript.

573 **Competing Interests**

574 C.A.L. has received consulting fees from Astellas Pharmaceuticals and Odyssey Therapeutics  
575 and is an inventor on patents pertaining to Kras regulated metabolic pathways, redox control  
576 pathways in cancer, and targeting the GOT1-pathway as a therapeutic approach.

577

578

579

## 580 References

- 581 1. E. L. Pearce, E. J. Pearce, Metabolic pathways in immune cell activation and quiescence. *Immunity* **38**,  
582 633-643 (2013).
- 583 2. R. Geiger *et al.*, L-Arginine Modulates T Cell Metabolism and Enhances Survival and Anti-tumor Activity.  
584 *Cell* **167**, 829-842 e813 (2016).
- 585 3. K. Voss *et al.*, A guide to interrogating immunometabolism. *Nat Rev Immunol* 10.1038/s41577-021-  
586 00529-8 (2021).
- 587 4. P. M. Gubser *et al.*, Rapid effector function of memory CD8+ T cells requires an immediate-early glycolytic  
588 switch. *Nat Immunol* **14**, 1064-1072 (2013).
- 589 5. J. A. Shyer, R. A. Flavell, W. Bailis, Metabolic signaling in T cells. *Cell Res* **30**, 649-659 (2020).
- 590 6. M. O. Johnson *et al.*, Distinct Regulation of Th17 and Th1 Cell Differentiation by Glutaminase-Dependent  
591 Metabolism. *Cell* **175**, 1780-1795 e1719 (2018).
- 592 7. D. Klysz *et al.*, Glutamine-dependent alpha-ketoglutarate production regulates the balance between T  
593 helper 1 cell and regulatory T cell generation. *Sci Signal* **8**, ra97 (2015).
- 594 8. D. Kovalovsky *et al.*, The BTB-zinc finger transcriptional regulator PLZF controls the development of  
595 invariant natural killer T cell effector functions. *Nat Immunol* **9**, 1055-1064 (2008).
- 596 9. A. K. Savage *et al.*, The transcription factor PLZF directs the effector program of the NKT cell lineage.  
597 *Immunity* **29**, 391-403 (2008).
- 598 10. H. Wang, K. A. Hogquist, How Lipid-Specific T Cells Become Effectors: The Differentiation of iNKT Subsets.  
599 *Front Immunol* **9**, 1450 (2018).
- 600 11. J. L. Baron *et al.*, Activation of a nonclassical NKT cell subset in a transgenic mouse model of hepatitis B  
601 virus infection. *Immunity* **16**, 583-594 (2002).
- 602 12. E. Durante-Mangoni *et al.*, Hepatic CD1d expression in hepatitis C virus infection and recognition by  
603 resident proinflammatory CD1d-reactive T cells. *J Immunol* **173**, 2159-2166 (2004).
- 604 13. C. M. Crosby, M. Kronenberg, Invariant natural killer T cells: front line fighters in the war against  
605 pathogenic microbes. *Immunogenetics* **68**, 639-648 (2016).
- 606 14. Z. Illes *et al.*, Differential expression of NK T cell V alpha 24J alpha Q invariant TCR chain in the lesions of  
607 multiple sclerosis and chronic inflammatory demyelinating polyneuropathy. *J Immunol* **164**, 4375-4381  
608 (2000).
- 609 15. L. Beaudoin, V. Laloux, J. Novak, B. Lucas, A. Lehuen, NKT cells inhibit the onset of diabetes by impairing  
610 the development of pathogenic T cells specific for pancreatic beta cells. *Immunity* **17**, 725-736 (2002).
- 611 16. M. Lisbonne *et al.*, Cutting edge: invariant V alpha 14 NKT cells are required for allergen-induced airway  
612 inflammation and hyperreactivity in an experimental asthma model. *J Immunol* **171**, 1637-1641 (2003).
- 613 17. J. Cui *et al.*, Requirement for Valpha14 NKT cells in IL-12-mediated rejection of tumors. *Science* **278**, 1623-  
614 1626 (1997).
- 615 18. M. V. Dhodapkar *et al.*, A reversible defect in natural killer T cell function characterizes the progression  
616 of premalignant to malignant multiple myeloma. *J Exp Med* **197**, 1667-1676 (2003).
- 617 19. L. S. Metelitsa *et al.*, Natural killer T cells infiltrate neuroblastomas expressing the chemokine CCL2. *J Exp*  
618 *Med* **199**, 1213-1221 (2004).
- 619 20. R. Viale, R. Ware, I. Maricic, V. Chaturvedi, V. Kumar, NKT Cell Subsets Can Exert Opposing Effects in  
620 Autoimmunity, Tumor Surveillance and Inflammation. *Curr Immunol Rev* **8**, 287-296 (2012).
- 621 21. A. K. Savage, M. G. Constantinides, A. Bendelac, Promyelocytic leukemia zinc finger turns on the effector  
622 T cell program without requirement for agonist TCR signaling. *J Immunol* **186**, 5801-5806 (2011).
- 623 22. T. Kreslavsky *et al.*, TCR-inducible PLZF transcription factor required for innate phenotype of a subset of  
624 gammadelta T cells with restricted TCR diversity. *Proc Natl Acad Sci U S A* **106**, 12453-12458 (2009).
- 625 23. S. Roy, Z. A. Rizvi, A. Awasthi, Metabolic Checkpoints in Differentiation of Helper T Cells in Tissue  
626 Inflammation. *Front Immunol* **9**, 3036 (2018).

- 627 24. R. J. Salmond, mTOR Regulation of Glycolytic Metabolism in T Cells. *Front Cell Dev Biol* **6**, 122 (2018).  
628 25. N. Prevot *et al.*, Mammalian target of rapamycin complex 2 regulates invariant NKT cell development and  
629 function independent of promyelocytic leukemia zinc-finger. *J Immunol* **194**, 223-230 (2015).  
630 26. L. Zhang *et al.*, Mammalian target of rapamycin complex 1 orchestrates invariant NKT cell differentiation  
631 and effector function. *J Immunol* **193**, 1759-1765 (2014).  
632 27. P. C. Ho *et al.*, Phosphoenolpyruvate Is a Metabolic Checkpoint of Anti-tumor T Cell Responses. *Cell* **162**,  
633 1217-1228 (2015).  
634 28. L. A. Sena *et al.*, Mitochondria are required for antigen-specific T cell activation through reactive oxygen  
635 species signaling. *Immunity* **38**, 225-236 (2013).  
636 29. J. Blagih *et al.*, The energy sensor AMPK regulates T cell metabolic adaptation and effector responses in  
637 vivo. *Immunity* **42**, 41-54 (2015).  
638 30. H. Park, M. Tsang, B. M. Iritani, M. J. Bevan, Metabolic regulator Flnp1 is crucial for iNKT lymphocyte  
639 development. *Proc Natl Acad Sci U S A* **111**, 7066-7071 (2014).  
640 31. M. Salio *et al.*, Essential role for autophagy during invariant NKT cell development. *Proc Natl Acad Sci U*  
641 *S A* **111**, E5678-5687 (2014).  
642 32. A. Kumar *et al.*, Enhanced oxidative phosphorylation in NKT cells is essential for their survival and  
643 function. *Proc Natl Acad Sci U S A* **116**, 7439-7448 (2019).  
644 33. S. Fu *et al.*, Impaired lipid biosynthesis hinders anti-tumor efficacy of intratumoral iNKT cells. *Nat*  
645 *Commun* **11**, 438 (2020).  
646 34. E. L. Carr *et al.*, Glutamine uptake and metabolism are coordinately regulated by ERK/MAPK during T  
647 lymphocyte activation. *J Immunol* **185**, 1037-1044 (2010).  
648 35. T. W. Mak *et al.*, Glutathione Primes T Cell Metabolism for Inflammation. *Immunity* **46**, 675-689 (2017).  
649 36. L. Araujo, P. Khim, H. Mkhikian, C. L. Mortales, M. Demetriou, Glycolysis and glutaminolysis cooperatively  
650 control T cell function by limiting metabolite supply to N-glycosylation. *Elife* **6** (2017).  
651 37. M. Swamy *et al.*, Glucose and glutamine fuel protein O-GlcNAcylation to control T cell self-renewal and  
652 malignancy. *Nat Immunol* **17**, 712-720 (2016).  
653 38. G. Qing *et al.*, ATF4 regulates MYC-mediated neuroblastoma cell death upon glutamine deprivation.  
654 *Cancer Cell* **22**, 631-644 (2012).  
655 39. L. Chen, H. Cui, Targeting Glutamine Induces Apoptosis: A Cancer Therapy Approach. *Int J Mol Sci* **16**,  
656 22830-22855 (2015).  
657 40. O. Abu Aboud *et al.*, Glutamine Addiction in Kidney Cancer Suppresses Oxidative Stress and Can Be  
658 Exploited for Real-Time Imaging. *Cancer Res* **77**, 6746-6758 (2017).  
659 41. H. C. Yoo, Y. C. Yu, Y. Sung, J. M. Han, Glutamine reliance in cell metabolism. *Exp Mol Med* **52**, 1496-1516  
660 (2020).  
661 42. P. Nicklin *et al.*, Bidirectional transport of amino acids regulates mTOR and autophagy. *Cell* **136**, 521-534  
662 (2009).  
663 43. K. G. Anderson, I. M. Stromnes, P. D. Greenberg, Obstacles Posed by the Tumor Microenvironment to T  
664 cell Activity: A Case for Synergistic Therapies. *Cancer Cell* **31**, 311-325 (2017).  
665 44. N. M. Cetinbas *et al.*, Glucose-dependent anaplerosis in cancer cells is required for cellular redox balance  
666 in the absence of glutamine. *Sci Rep* **6**, 32606 (2016).  
667 45. Y. H. Kim, A. Kumar, C. H. Chang, K. Pyaram, Reactive Oxygen Species Regulate the Inflammatory Function  
668 of NKT Cells through Promyelocytic Leukemia Zinc Finger. *J Immunol* **199**, 3478-3487 (2017).  
669 46. A. Y. Choo *et al.*, Glucose addiction of TSC null cells is caused by failed mTORC1-dependent balancing of  
670 metabolic demand with supply. *Mol Cell* **38**, 487-499 (2010).  
671 47. T. Sklarz *et al.*, mTORC2 regulates multiple aspects of NKT-cell development and function. *Eur J Immunol*  
672 **47**, 516-526 (2017).  
673 48. J. L. Jewell *et al.*, Metabolism. Differential regulation of mTORC1 by leucine and glutamine. *Science* **347**,  
674 194-198 (2015).



- 675 49. R. V. Duran *et al.*, Glutaminolysis activates Rag-mTORC1 signaling. *Mol Cell* **47**, 349-358 (2012).  
676 50. J. F. Gera *et al.*, AKT activity determines sensitivity to mammalian target of rapamycin (mTOR) inhibitors  
677 by regulating cyclin D1 and c-myc expression. *J Biol Chem* **279**, 2737-2746 (2004).  
678 51. E. L. Pearce *et al.*, Enhancing CD8 T-cell memory by modulating fatty acid metabolism. *Nature* **460**, 103-  
679 107 (2009).  
680 52. M. Zarrouk, J. Rolf, D. A. Cantrell, LKB1 mediates the development of conventional and innate T cells via  
681 AMP-dependent kinase autonomous pathways. *PLoS One* **8**, e60217 (2013).  
682 53. M. G. Vander Heiden, L. C. Cantley, C. B. Thompson, Understanding the Warburg effect: the metabolic  
683 requirements of cell proliferation. *Science* **324**, 1029-1033 (2009).  
684 54. C. T. Hensley, A. T. Wasti, R. J. DeBerardinis, Glutamine and cancer: cell biology, physiology, and clinical  
685 opportunities. *J Clin Invest* **123**, 3678-3684 (2013).  
686 55. Z. Ma, D. J. Vocadlo, K. Vosseller, Hyper-O-GlcNAcylation is anti-apoptotic and maintains constitutive NF-  
687 kappaB activity in pancreatic cancer cells. *J Biol Chem* **288**, 15121-15130 (2013).  
688 56. K. Ichiyama *et al.*, The methylcytosine dioxygenase Tet2 promotes DNA demethylation and activation of  
689 cytokine gene expression in T cells. *Immunity* **42**, 613-626 (2015).  
690 57. X. Weng *et al.*, Mitochondrial metabolism is essential for invariant natural killer T cell development and  
691 function. *Proc Natl Acad Sci U S A* **118** (2021).  
692 58. C. H. Chang *et al.*, Posttranscriptional control of T cell effector function by aerobic glycolysis. *Cell* **153**,  
693 1239-1251 (2013).  
694 59. C. Gorrini, I. S. Harris, T. W. Mak, Modulation of oxidative stress as an anticancer strategy. *Nat Rev Drug*  
695 *Discov* **12**, 931-947 (2013).  
696 60. K. Duvel *et al.*, Activation of a metabolic gene regulatory network downstream of mTOR complex 1. *Mol*  
697 *Cell* **39**, 171-183 (2010).  
698 61. K. Renner *et al.*, Metabolic plasticity of human T cells: Preserved cytokine production under glucose  
699 deprivation or mitochondrial restriction, but 2-deoxy-glucose affects effector functions. *Eur J Immunol*  
700 **45**, 2504-2516 (2015).  
701 62. Y. Ota *et al.*, Effect of nutrient starvation on proliferation and cytokine secretion of peripheral blood  
702 lymphocytes. *Mol Clin Oncol* **4**, 607-610 (2016).

703

704

705

706

707

708

## 709 **Figure Legends**

710 **Fig. 1.** NKT cells increase glutaminolysis upon activation. (A and B) Freshly sorted NKT and  
711 CD4 T cells from C57BL/6 mice were subjected to metabolomic analysis through LC-MS/MS.  
712 (A) The volcano graph depicts upregulated and downregulated metabolites in resting NKT cells  
713 compared to CD4 T cells (n=3). (B) Graph shows relative levels of the indicated metabolites in  
714 resting NKT cells vs. CD4 T cells (n=3). (C and D) NKT cells were stimulated with  $\alpha$ GalCer (100  
715 ng/ml) for 3 days. The cell lysate was prepared from unstimulated (D0) and stimulated (D3)  
716 NKT cells. Media was also collected on day 3 (D3) of activation. Cell lysate and media samples  
717 were subjected to metabolomic analysis through LC-MS/MS. (C) Heatmap represents relative  
718 levels of metabolites in unstimulated and stimulated NKT cells (n=3). (D) Heatmap shows  
719 relative levels of metabolites in the media collected from unstimulated and stimulated NKT cells  
720 (n=3). Data are shown as mean  $\pm$  SEM. \*p<0.05, \*\*p<0.01 were considered significant.

721 **Fig. 2.** Glutamine metabolism is essential for NKT cell survival and proliferation. (A) The  
722 schematic depicts key branches of glutamine metabolism producing  $\alpha$ KG and GSH as well as  
723 utilization of glutamine in the HBP to synthesize O-GlcNAc. Pathway-specific inhibitors are  
724 shown in bold and the names of target enzymes are italicized. (B and C) Sorted NKT cells from  
725 C57BL/6 mice were labeled with 5  $\mu$ M CellTrace Violet (CTV) and stimulated with  $\alpha$ GalCer (100  
726 ng/ml) for 3 days in the indicated culture conditions. (B) The graph shows glutamate levels in  
727 NKT cells activated in the presence or absence of glutamine (n=3). (C) Graphs show cell  
728 survival (relative levels of percentages of live cells) measured by live/dead marker staining,  
729 CD25 expression, and cell proliferation of NKT cells activated in the presence or absence of  
730 CB839 (n=4). Control levels were set at 1. (D) NKT cells from WT and GLS1 KO mice were  
731 activated for 3 days as in (B). Graphs show total live NKT cell numbers, percentages of cell  
732 survival, and cell proliferation (n=3). (E) Sorted NKT cells were activated in the presence or  
733 absence of glutamine. GSH levels on day 3 of activation are shown (n=3). (F and G) NKT cells  
734 were activated for 3 days in the presence or absence of BSO (F) or EGCG (G). Graphs show  
735 cell survival and proliferation (n=3). (H) The levels of O-GlcNAc in NKT cells with and without  
736 activation were compared (n=3). (I) Sorted NKT cells were stimulated for 3 days in the presence  
737 or absence of either glutamine or glucose as indicated. The graph shows the relative mean  
738 fluorescent intensity (MFI) of O-GlcNAc on day 3 of activation (n=3). (J and K) NKT cells were  
739 activated for 3 days in the presence or absence of DON (J) or OSMI (K). Cell survival and

740 proliferation were shown (n=3). All data are representative of or combined from at least three  
741 independent experiments. Data are shown as mean  $\pm$  SEM. \*p<0.05, \*\*p<0.01.

742 **Fig. 3.** GSH-mediated redox balance is essential for NKT cells homeostasis.

743 Sorted NKT cells from C57BL/6 mice were stimulated for 3 days in the presence or absence of  
744 BSO. (A-D) Histograms and graphs show total ROS levels measured using DCFDA (A),  
745 mitochondrial ROS measured by MitoSOX (B), mitochondrial mass by MitoTracker (C), and  
746 mitochondrial potential by TMRM (D) in activated NKT cells (n=3). (E and F) NKT cells were  
747 activated for 3 days in the presence or absence of BSO (250  $\mu$ M) and NAC (10 mM). Histograms  
748 and graphs show total ROS levels (E), cell survival and cell proliferation (F) and mitochondrial  
749 potential (G) (n=3). All data are representative of or combined from at least three different  
750 experiments. Data are shown as mean  $\pm$  SEM. \*p <0.05, \*\*p<0.01.

751 **Fig. 4.** IFN $\gamma$  and IL-4 production in NKT cells rely on distinct branches of glutamine metabolism.

752 Sorted NKT cells from C57BL/6 mice were stimulated for 3 days in the indicated culture  
753 conditions. (A) Representative dot plots show cytokine expression in NKT cells from WT and  
754 GLS1 KO mice. Graphs show cumulative data from 3 independent experiments. (B and C) NKT  
755 cells were activated in the presence or absence of DON (10  $\mu$ M). Intracellular cytokine  
756 expression (B) and the levels of cytokine secreted into the media by ELISA (C) were measured  
757 (n=3). (D) The graph shows cytokine expression in NKT cells stimulated in the presence or  
758 absence of BSO (n=3). (E) NKT cells were stimulated with or without glutamine (Gn) and  
759 cytokine expression was compared at day 3. Data are shown as mean  $\pm$  SEM. All data are  
760 representative of or combined from at least three independent experiments. \*p<0.05, \*\*p<0.01,  
761 ns: not significant.

762 **Fig. 5.** NKT cells exhibit a glutamine-addicted phenotype. (A) The graph shows hexokinase 2  
763 (HK2) expression in NKT cells with and without stimulation (n=3). (B) Heat map shows relative  
764 levels of the indicated PPP metabolites in NKT cells compared to CD4 T cells analyzed after  
765 LC-MS/MS analysis (n=3). (C) Heatmap shows HBP metabolites in NKT cells with and without  
766 stimulation as analyzed by LC-MS/MS (n=3). (D and E) Graphs show cell survival and  
767 proliferation of NKT cells stimulated in the presence of EGCG (20  $\mu$ M) together with sodium  
768 pyruvate (1 mM) (D, or with dimethyl alpha-ketoglutarate (DM $\alpha$ KG) (1.5 mM) (E). (n=3). (F)  
769 Cells in (E) were used to measure mitochondrial potential, mitochondrial mass, and CD25

770 expression (n=3). (G) NKT cells were stimulated for 3 days in the presence or absence of  
771 glutamine (2 mM) in combination with DM $\alpha$ KG (1.5 mM). Graphs show relative percentages of  
772 cytokine positive NKT cells (n=3). All relative levels were calculated using the MFI values of the  
773 control as 1. All data are representative of or combined from at least three different experiments.  
774 Data are shown as mean  $\pm$  SEM. \*p<0.05. \*\*p<0.01, \*\*\*p<0.001, \*\*\*\*p<0.0001. ns: not  
775 significant.

776 **Fig. 6.** Glutaminolysis is important for NKT cell responses to *Listeria* infection. WT and GLS1  
777 KO mice were injected with either 10<sup>5</sup> CFU/mouse of LM-Ova (Lm) or PBS intraperitoneally.  
778 Two days after infection, spleens and livers were harvested and analyzed for bacterial load,  
779 NKT cell proliferation, and IFN $\gamma$  expression. (A and B) Graphs show levels of CD98 expression  
780 and GSH in NKT cells from the spleen (left panel) and the liver (right panel) of PBS- and Lm-  
781 injected WT mice (n=6). (C) Graphs show bacterial loads in the spleens and livers of infected  
782 WT and GLS1 KO mice (n=6). (D) Graphs show CD69 expression in splenic and hepatic NKT  
783 cells from WT and GLS1 KO mice (n=6). (E) Representative dot plots and graphs show cell  
784 proliferation as measured by Ki-67 expression in NKT cells from the spleen and liver (n=6). (F)  
785 To assess IFN $\gamma$  expression, total splenocytes were incubated in the presence of Monensin for  
786 2 h to prevent cytokine secretion followed by comparing intracellular expression of IFN $\gamma$  in  
787 splenic (top panel) and hepatic (bottom panel) NKT cells (n=6). Data are shown as mean  $\pm$   
788 SEM. \*p <0.05; \*\*p<0.01. ns: not significant.

789 **Fig. 7.** mTORC1-AMPK signaling regulates both glucose and glutamine metabolism in NKT  
790 cells. (A-D) Sorted NKT cells were stimulated for three days with and without rapamycin (2 nM).  
791 Representative histograms and graphs show relative HK2 expression (A), CD98 expression  
792 (B), GSH production (C), and O-GlcNAc levels (D) in stimulated NKT cells (n=3). (E) NKT cells  
793 were activated for three days under the indicated conditions and relative expression of  
794 pS6<sup>Ser235/236</sup> was compared (n=3). (F) Graphs show relative expression of c-Myc in NKT cells  
795 activated for 3 days in the presence or absence of either glutamine or CB839 (n=3). (G) Relative  
796 expressions of pAMPK without (D0) and with (D3) activation are shown (n=3). (H) Cell survival  
797 and proliferation of WT and AMPK KO NKT cells after 3 days of activation (n=3). (I) Glutamate  
798 and  $\alpha$ KG levels were compared between WT and AMPK KO NKT cells after 3 days of activation.  
799 (J and K) WT and AMPK KO NKT cells were labeled with CTV and stimulated in the presence

800 or absence of CB839 for 3 days. (J) Graphs show cytokine expression comparison between  
801 WT and AMPK KO NKT cells (n=3). (K) Histograms show cell proliferation (n=2). Control levels  
802 were set at 1. Data are shown as mean  $\pm$  SEM. \*p<0.05, \*\*p<0.01. ns: not significant.

803

804

805

806

**Figure 1**

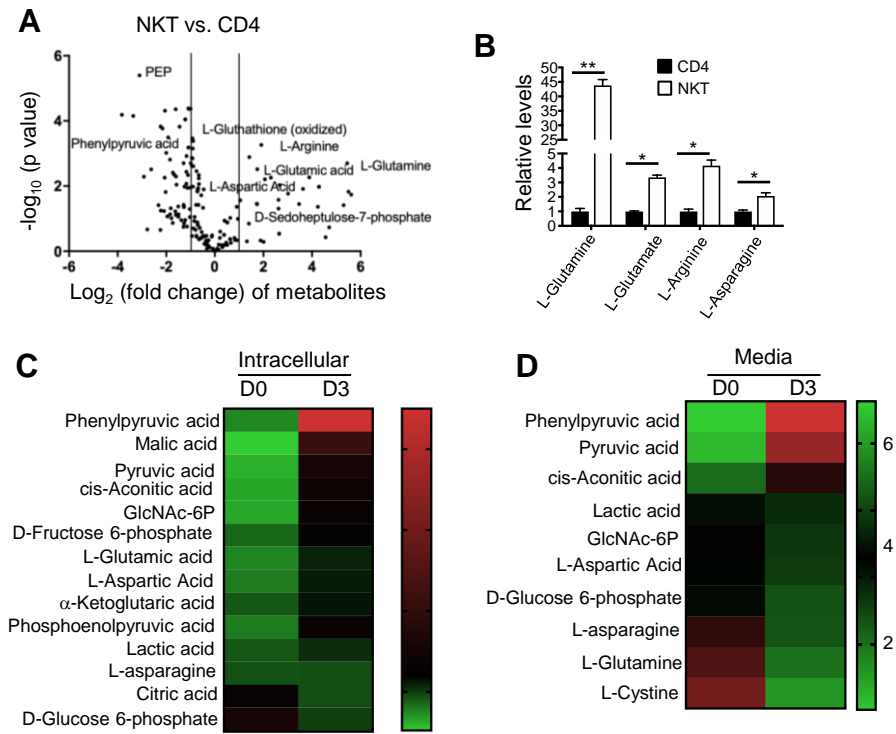

**Figure 2**

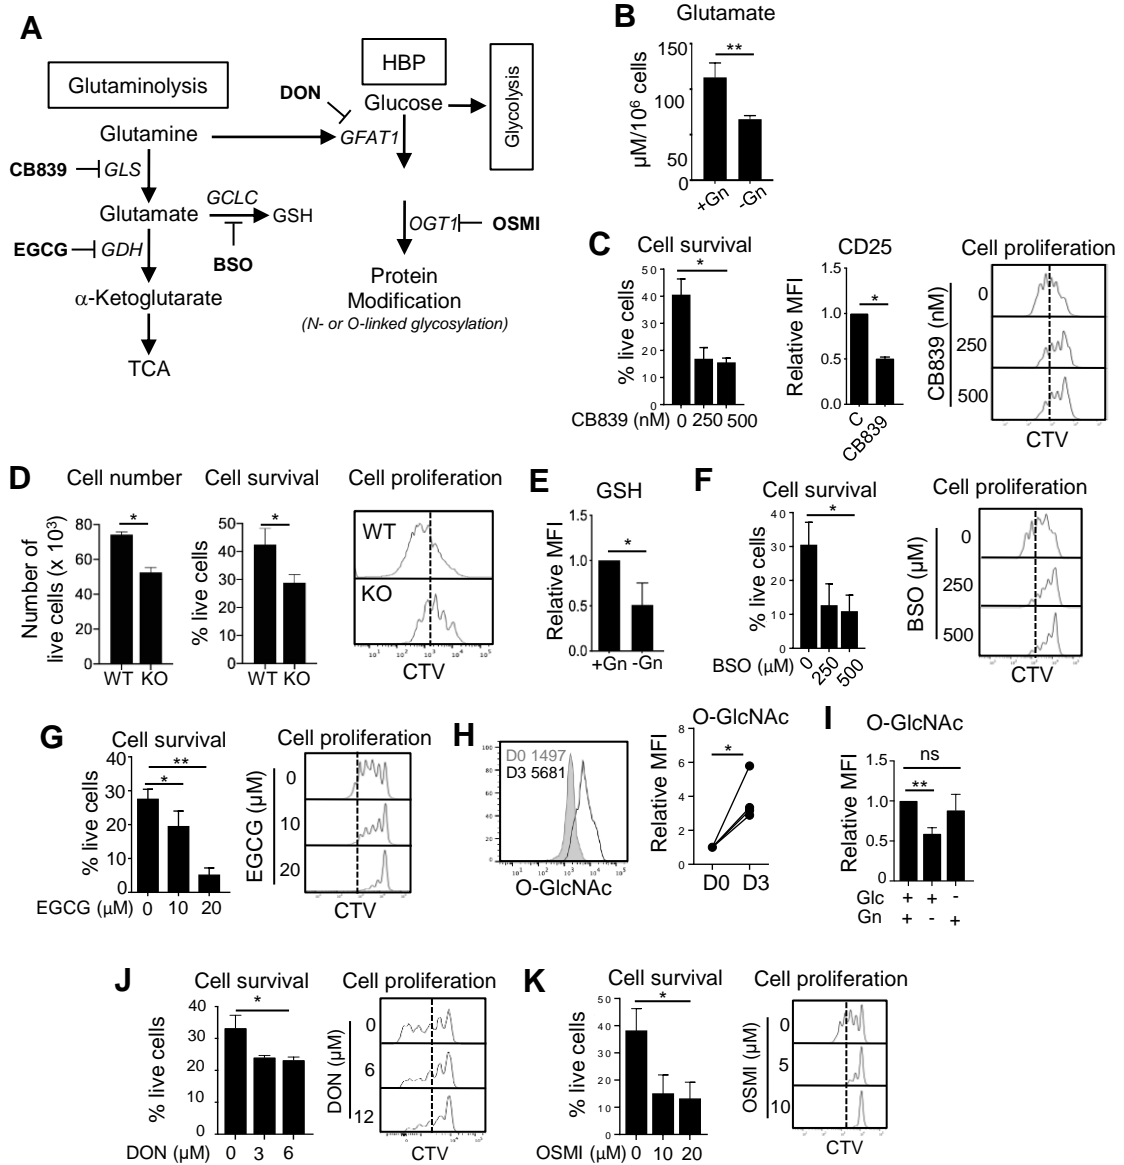

**Figure 3**

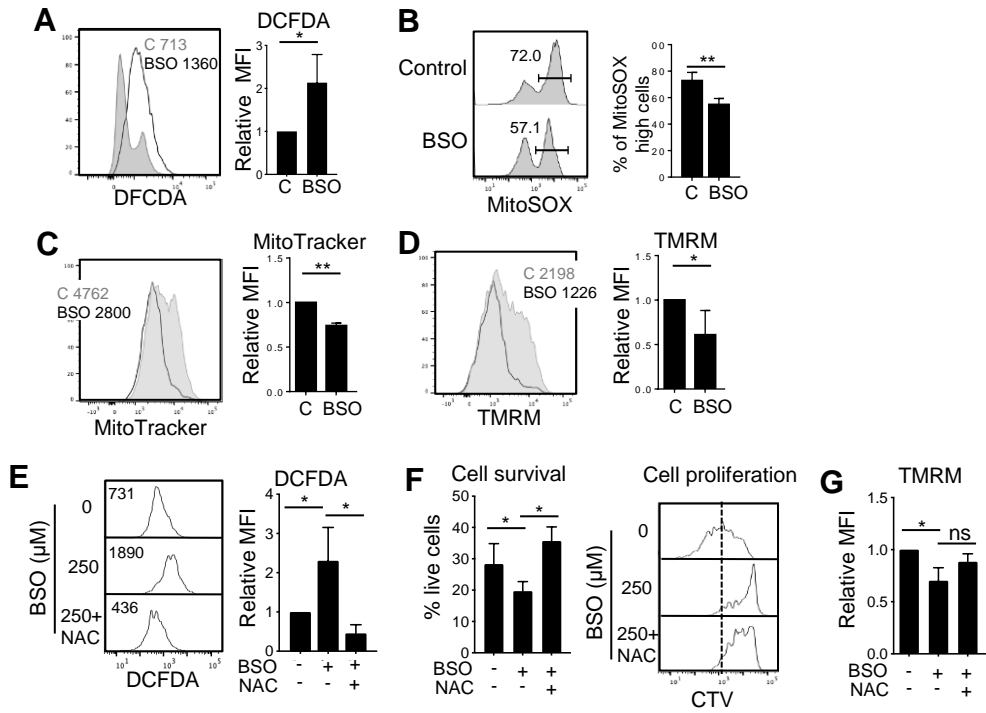



Figure 4

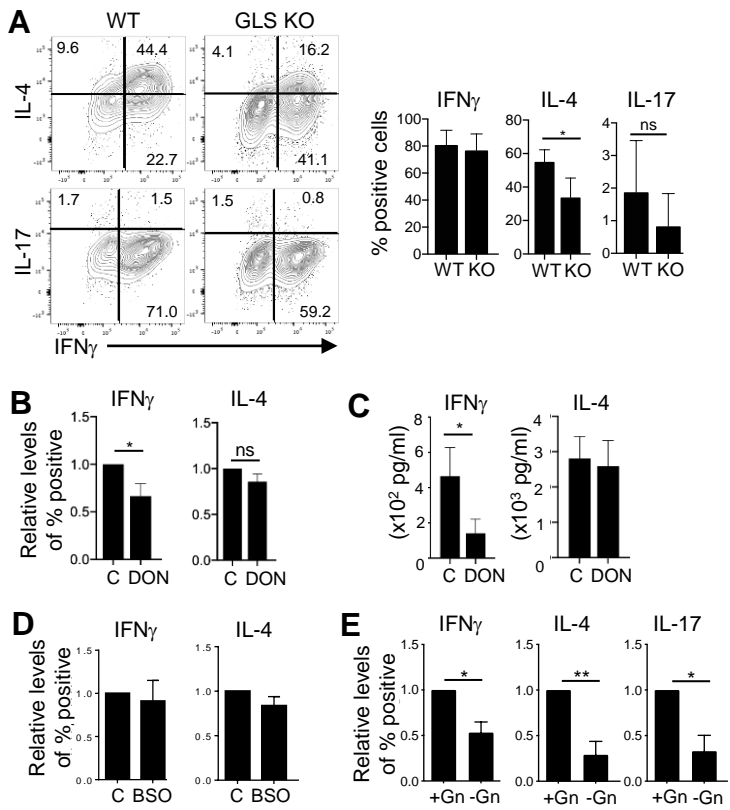

**Figure 5**

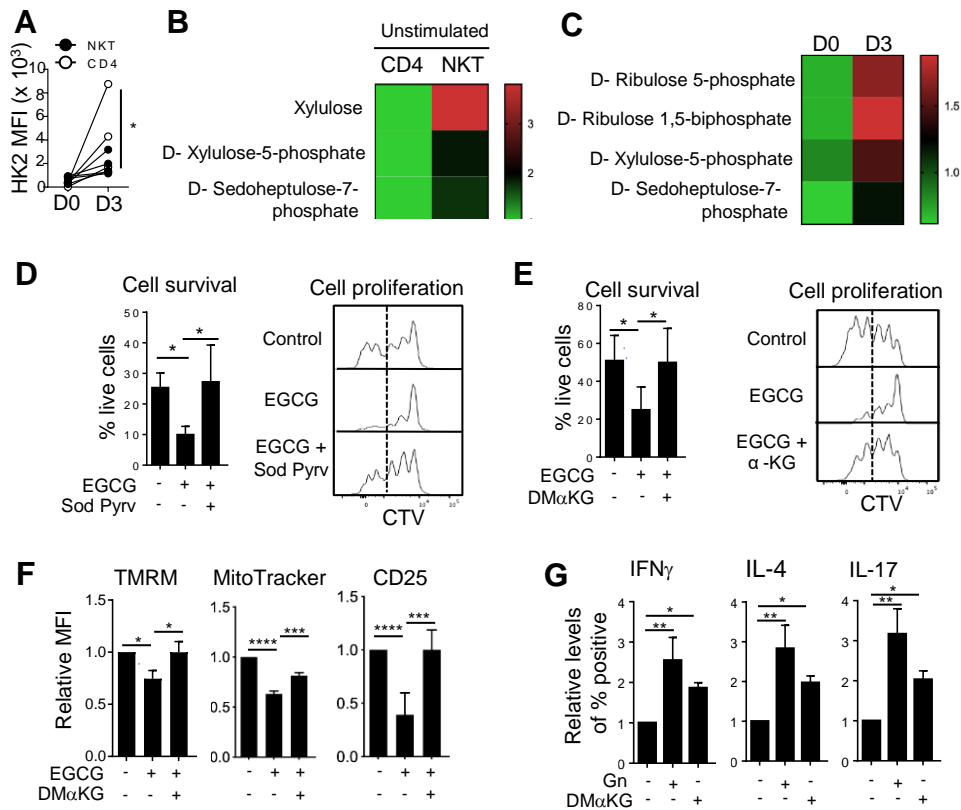

**Figure 6**

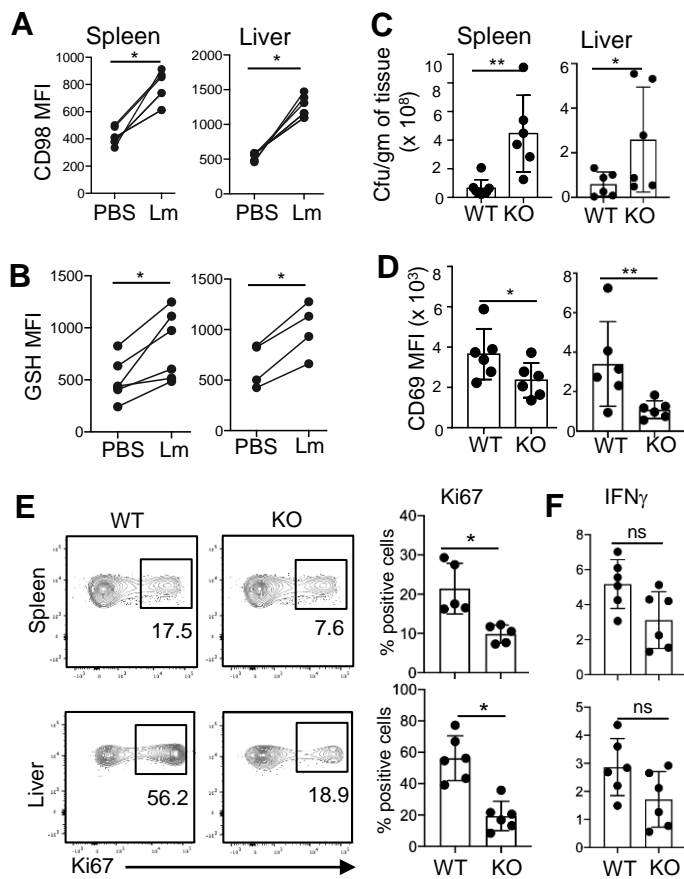

**Figure 7**

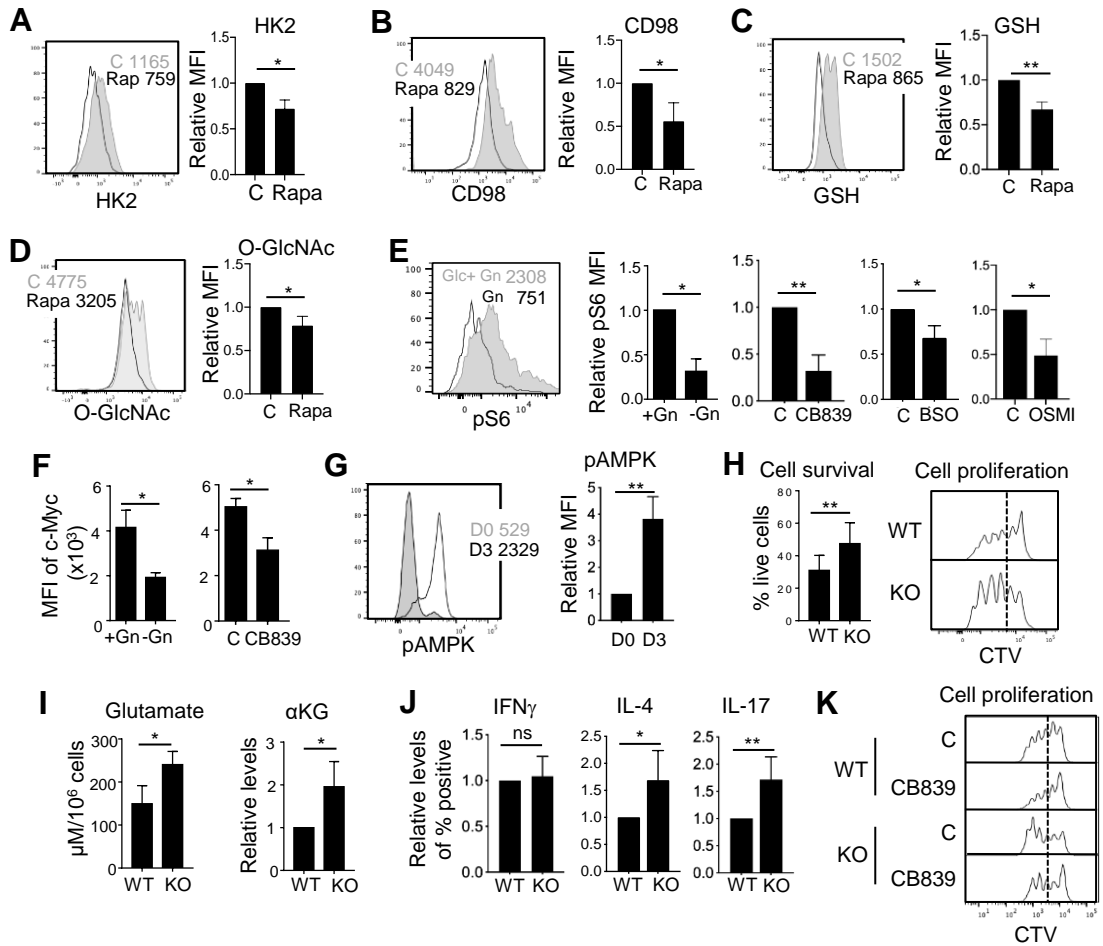

Source: https://www.biorxiv.org/content/biorxiv/early/2021/10/09/2021.10.07.463490.full.pdf
